# Supplementary material for: ZmADF5, a Maize Actin-Depolymerizing Factor Conferring Enhanced Drought Tolerance in Maize
Source: MDPI journal article supplement (doi:10.3390/plants13050619), 2024-02-24
Supplement: s1 [file s1]

Supplementary Table S1. Information regarding all 78 ADF genes in maize and six other plant species

| Organism               | Serial number | Gene name | Gene ID   | Accession number  | Chromosome | Location v4          |
|------------------------|---------------|-----------|-----------|-------------------|------------|----------------------|
| <i>Zea mays</i>        | 1             | ZmADF3-2  | 542445    | GRMZM2G060702     | 1          | 298705823..298708006 |
|                        | 2             | ZmADFn-1  | 100285480 | GRMZM2G064875     | 1          | 81672408..81675503   |
|                        | 3             | ZmADF3-1  | 103644252 | Zm00001d034643    | 1          | 298703861..298705313 |
|                        | 4             | ZmADF2-1  | 103645671 | GRMZM2G108807     | 1          | 289262168..289336459 |
|                        | 5             | ZmADF5-1  | 100381350 | GRMZM2G077942     | 1          | 33147666..33150364   |
|                        | 6             | ZmADF2-2  | 542584    | GRMZM2G097122     | 2          | 205994782..205995797 |
|                        | 7             | ZmADFn-3  | 100285352 | GRMZM2G071327     | 2          | 20017525..20018783   |
|                        | 8             | ZmADFn-2  | 100193829 | GRMZM2G071253     | 2          | 20013226..20016905   |
|                        | 9             | ZmADFn-4  | 100282518 | GRMZM2G463471     | 4          | 156845488..156847462 |
|                        | 10            | ZmADF3-3  | 100280568 | GRMZM2G002825     | 5          | 2443271..2445180     |
|                        | 11            | ZmADF6    | 100281968 | GRMZM2G130678     | 5          | 5373242..5376437     |
|                        | 12            | ZmADFn-5  | 100282060 | GRMZM2G015127     | 5          | 198490211..198492974 |
|                        | 13            | ZmADF4    | 100192897 | GRMZM2G037140     | 6          | 37509082..37510152   |
|                        | 14            | ZmADF1    | 542430    | GRMZM2G117603     | 7          | 154119509..154120538 |
|                        | 15            | ZmADF5-2  | 100280108 | GRMZM2G147775     | 9          | 145900593..145902671 |
| <i>Sorghum bicolor</i> | 1             | ADF5      | 8054356   | SORBI_3001G439700 | 1          | 71771097..71778096   |
|                        | 2             | ADF10     | 8063189   | SORBI_3001G322400 | 1          | 60971096..60972981   |
|                        | 3             | ADF2      | 8084159   | SORBI_3001G070000 | 1          | 5311254..5314090     |
|                        | 4             | ADF3-2    | 8057046   | SORBI_3001G034900 | 1          | 2635373..2636325     |
|                        | 5             | ADF3-1    | 110431716 | SORBI_3001G034700 | 1          | 2632418..2634799     |
|                        | 6             | ADF7-1    | 8081480   | SORBI_3001G417600 | 1          | 69867933..69869832   |
|                        | 7             | ADF1-1    | 8080684   | SORBI_3002G303500 | 2          | 67939285..67940524   |
|                        | 8             | ADF1-2    | 8076067   | SORBI_3004G290500 | 4          | 63125568..63127632   |
|                        | 9             | ADF6      | 8055977   | SORBI_3006G173400 | 6          | 52942755..52947691   |

|                             |    |        |           |                   |         |                    |
|-----------------------------|----|--------|-----------|-------------------|---------|--------------------|
| <i>Arabidopsis thaliana</i> | 10 | ADF7-2 | 8068689   | SORBI_3009G015700 | 9       | 1474863..1477081   |
|                             | 1  | ADF11  | 839281    | AT1G01750         | 1       | 275188..276310     |
|                             | 2  | ADF5   | 816171    | AT2G16700         | 2       | 7244500..7246069   |
|                             | 3  | ADF6   | 817676    | AT2G31200         | 2       | 13293953..13295410 |
|                             | 4  | ADF1   | 823744    | AT3G46010         | 3       | 16909217..16910845 |
|                             | 5  | ADF2   | 823743    | AT3G46000         | 3       | 16907334..16909119 |
|                             | 6  | ADF7   | 828664    | AT4G25590         | 4       | 13058936..13060250 |
|                             | 7  | ADF9   | 829649    | AT4G34970         | 4       | 16653704..16654955 |
|                             | 8  | ADF8   | 828037    | AT4G00680         | 4       | 279596..281072     |
|                             | 9  | ADF3   | 836110    | AT5G59880         | 5       | 24120164..24121949 |
|                             | 10 | ADF4   | 836111    | AT5G59890         | 5       | 24122348..24123912 |
| <i>Glycine max</i>          | 11 | ADF10  | 835312    | AT5G52360         | 5       | 21257934..21259408 |
|                             | 1  | ADF7-1 | 100795241 | GLYMA_01G218900   | 1       | 54866040..54868160 |
|                             | 2  | ADF6   | 100819975 | GLYMA_03G162900   | 3       | 37777445..37779668 |
|                             | 3  | ADF5-1 | 100793035 | LOC100793035      | 4       | 371128..371982     |
|                             | 4  | ADF7-2 | 100779214 | GLYMA_05G206500   | 5       | 38926889..38929620 |
|                             | 5  | ADF5-2 | 100785493 | GLYMA_06G003900   | 6       | 363520..364578     |
|                             | 6  | ADF7-3 | 100790487 | GLYMA_08G013400   | 8       | 1051083..1052993   |
|                             | 7  | ADF2   | 100813011 | GLYMA_09G019200   | 9       | 1510124..1512174   |
|                             | 8  | ADF7-4 | 100785437 | GLYMA_11G024500   | 11      | 1745509..1747339   |
|                             | 9  | ADF9   | 100801857 | GLYMA_11G106600   | 11      | 8127320..8128434   |
| <i>Solanum tuberosum</i>    | 10 | ADF1   | 100305514 | GLYMA_15G125300   | 15      | 9943757..9945795   |
|                             | 1  | ADFn-2 | 102599827 | LOC102599827      | unknown | 1126680..1129510   |
|                             | 2  | ADF1-2 | 102596934 | LOC102596934      | unknown | 1457226..1460021   |
|                             | 3  | ADF2-1 | 102594782 | LOC102594782      | unknown | 17536..18062       |
|                             | 4  | ADF2-3 | 102590986 | LOC102590986      | unknown | 178712..181291     |

|                                       |    |         |           |                |         |                    |
|---------------------------------------|----|---------|-----------|----------------|---------|--------------------|
| <i>Oryza sativa</i><br>Japonica Group | 5  | ADF12-2 | 102586653 | LOC102586653   | unknown | 1939875..1941414   |
|                                       | 6  | ADF7    | 102597057 | LOC102597057   | unknown | 235200..236192     |
|                                       | 7  | ADF10   | 102606033 | LOC102606033   | unknown | 240916..243061     |
|                                       | 8  | ADF12-1 | 102593491 | LOC102593491   | unknown | 259862..261304     |
|                                       | 9  | ADF2-2  | 102598836 | LOC102598836   | unknown | 46189..48980       |
|                                       | 10 | ADF5    | 102593190 | LOC102593190   | unknown | 515119..516386     |
|                                       | 11 | ADFn-1  | 102588600 | LOC102588600   | unknown | 611032..614519     |
|                                       | 12 | ADF1-1  | 102585767 | LOC102585767   | unknown | 958002..961423     |
|                                       | 1  | ADF1    | 4330233   | Os02g0663800   | 2       | 26919898..26922502 |
|                                       | 2  | ADF5    | 4332220   | Os03g0243100   | 3       | 7565326..7567806   |
|                                       | 3  | ADF4    | 4334595   | Os03g0820600   | 3       | 34431651..34434298 |
|                                       | 4  | ADF2    | 4334307   | Os03g0780400   | 3       | 32360704..32363839 |
|                                       | 5  | ADF3    | 4334594   | Os03g0820500   | 3       | 34430396..34431383 |
|                                       | 6  | ADF6    | 4336623   | Os04g0555700   | 4       | 27819097..27823259 |
|                                       | 7  | ADF7    | 4337605   | Os05g0113400   | 5       | 716229..718801     |
|                                       | 8  | ADF9    | 4343240   | Os07g0484200   | 7       | 17740678..17742313 |
|                                       | 9  | ADF8    | 107277944 | Os07g0297500   | 7       | 11644299..11646136 |
|                                       | 10 | ADF10   | 4349142   | Os10g0521100   | 10      | 20161035..20162733 |
|                                       | 11 | ADF11   | 4352848   | Os12g0628100   | 12      | 26888763..26890275 |
| <i>Setaria italica</i>                | 1  | ADF3-1  | 101766069 | SETIT_037963mg | IX      | 1870360..1872230   |
|                                       | 2  | ADF3-2  | 101766473 | SETIT_039957mg | IX      | 1872970..1873837   |
|                                       | 3  | ADF1    | 101763828 | SETIT_019388mg | I       | 33723205..33725149 |
|                                       | 4  | ADF2-1  | 101781863 | SETIT_037933mg | IX      | 3994768..3997798   |
|                                       | 5  | ADF7-1  | 101765915 | SETIT_023591mg | III     | 4012575..4014626   |
|                                       | 6  | ADF2-2  | 101765611 | SETIT_033222mg | II      | 40615294..40616310 |
|                                       | 7  | ADF10   | 101776880 | SETIT_038556mg | IX      | 41037419..41043163 |

|   |        |           |                |    |                    |
|---|--------|-----------|----------------|----|--------------------|
| 8 | ADF7-2 | 101769205 | SETIT_037959mg | IX | 49839978..49841232 |
| 9 | ADF5   | 101777854 | SETIT_037893mg | IX | 51467843..51470314 |

---

Supplementary Table S2. Primers used in this study

| Gene                 | Forward primer (5'-3')   | Reverse primer (5'-3')   |
|----------------------|--------------------------|--------------------------|
| <i>ZmADF5-1</i>      | TGCTCAGTAGTCAGTAGTC      | ACCCATCAACATCAACAC       |
| <i>ZmADF5-2</i>      | CGGTTCTTCCGAGAGATGGT     | CCATAACAACCTCTGGTCGGAAT  |
| <i>AtRAP2.6</i>      | GTCTCTGGTGAGACCGAACC     | GGCCTCTCCAAGGACATTGA     |
| <i>AtANS</i>         | ATGAACGACGTTTGGGGGAA     | ATCAACGAGTGGGTCACACC     |
| <i>AtPROT3</i>       | GAGGCGGGTACATAGCAGTT     | TTGAGCCAATGGCATAGCTT     |
| <i>AtMSL3</i>        | TCGTACGGAGTAGGTTAATTGTGT | TGAAAGACCAGTCCGAGTCAG    |
| <i>AtCYP707A3</i>    | AGGGGTGTTT TGGTAATTTGCAG | TCGTTCCAAGGCAATAGGCA     |
| <i>AtERF104</i>      | GCGGCTAGGGTTAAAGTGGA     | TACCATCTCCTGCTCCCACA     |
| <i>TUB4</i>          | GAGGGAGCCATTGACAACATCTT  | GCGAACAGTTCACAGCTATGTTCA |
| <i>GAPDH</i>         | CATCACCACGGACTACAT       | GACTCCACGACATACTCA       |
| <i>PAN580-ZmADF5</i> | ACCGGTCCCGGGGGATCC       | CTTGCTCACCATGGATCC       |
|                      | ATGGCGATGGCGTACAAG       | TTGCGCGCGGCCTCTGGA       |

Supplementary Table S3. Transgenic maize used in this study

| Name               | Species            | Origin              | Generation         | Control |
|--------------------|--------------------|---------------------|--------------------|---------|
| <i>ZmADF5</i> -OE1 | <i>Zea mays</i> L. | <i>ZmADF5</i> -H002 | BC <sub>3</sub> F1 | Zheng58 |
| <i>ZmADF5</i> -OE2 | <i>Zea mays</i> L. | <i>ZmADF5</i> -H005 | BC <sub>3</sub> F1 | Zheng58 |
| <i>ZmADF5</i> -KO1 | <i>Zea mays</i> L. | EA06                | T <sub>2</sub>     | C01     |
| <i>ZmADF5</i> -KO2 | <i>Zea mays</i> L. | EA21                | T <sub>2</sub>     | C01     |
